# Supplementary material
Source: Elsevier journal article supplement (https://www.sciencedirect.com/science/article/pii/S2238785419314206)
Supplement: mmc1 [file S2238785419314206:mmc1.docx]

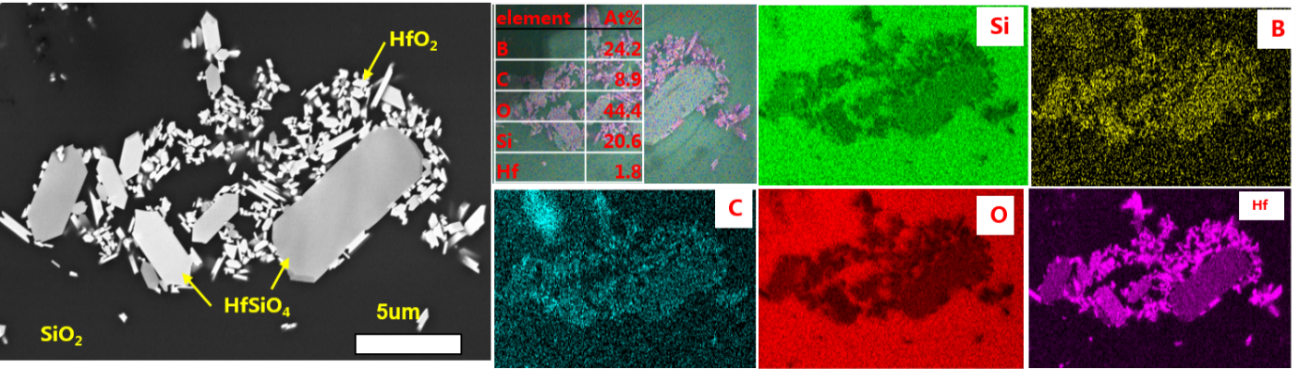


Fig. S1 Surface morphology and EDS elemental maps analysis of the SiBCN/HfC ceramic composites after oxidation at 1750 °C for 1 h.


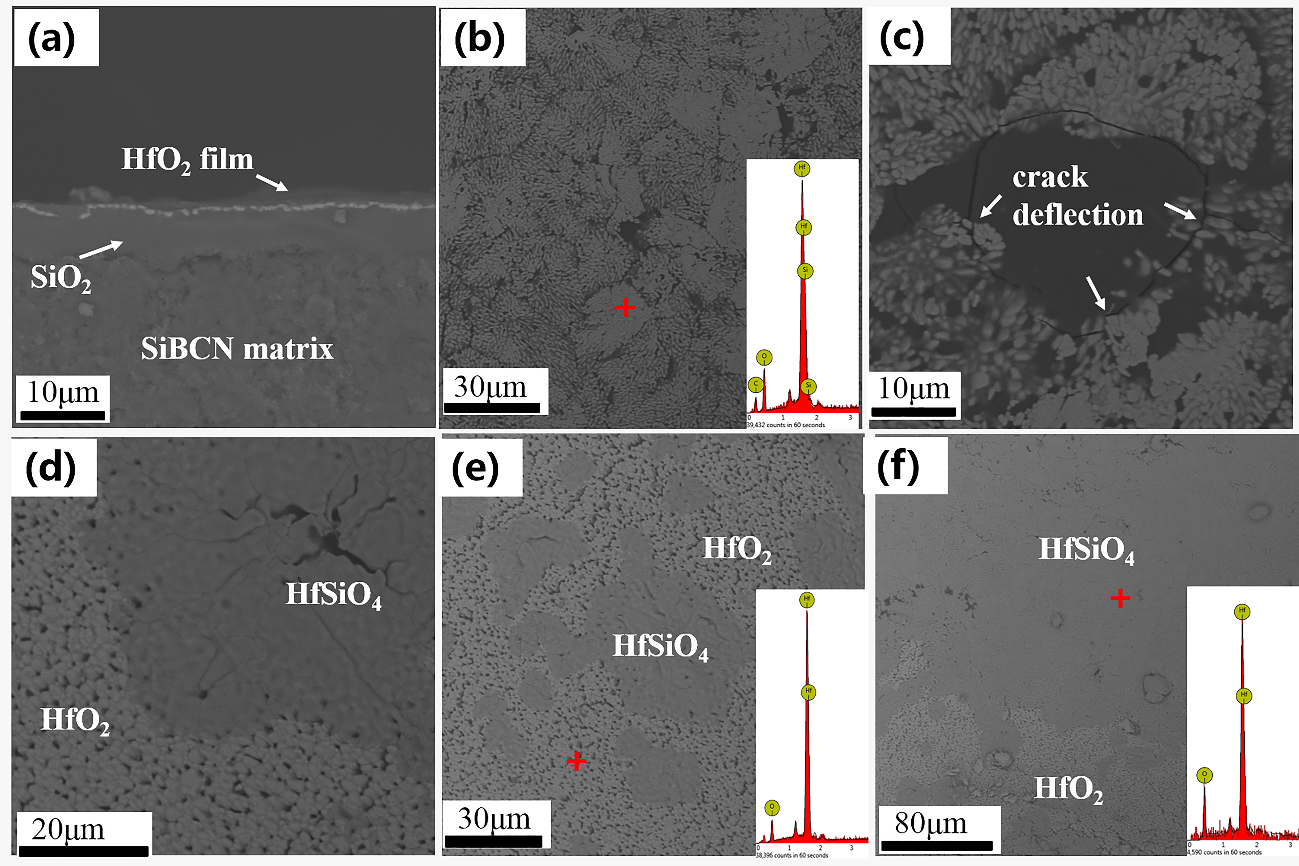


Fig. S2 SEM morphology of the HfO2-coated SiBCN and SiBCN/HfC ceramic composites after oxidation at 1500 ºC for 3h. (a) Fracture of SiBCN. (b)(c) Surface images of SiBCN at at different magnifications; (d)(e)(f) Surface images of the SiBCN/HfC ceramic composites at different magnifications.

In order to prove that the formation of HfSiO4 originated from reaction of HfO2 and SiO2 can suppress the occurrence of surface cracks, the following experiment was conducted. HfO2 film with thickness of 200 nm was deposited on the surface of SiBCN and SiBCN/HfC ceramic composites via electron beam evaporation method. Then, the HfO2 coated SiBCN and SiBCN/HfC ceramic composites oxidized at 1500 ºC for 3h. The microstructure of samples were tested by SEM and XRD.

Fig. S2 shows the surface and fracture morphology of the HfO2-coated SiBCN and SiBCN/HfC ceramic composites after oxidation at 1500 ºC for 3h. Fig. S2(a) shows that a continuous and dense protective silica layer is formed and that there are no obvious cracks and pores in the fracture morphology of the SiBCN ceramics. However, Fig. S2(c) indicates that some cracks still occurred in the silica-rich area. The crack deflection and termination were observed near the HfO2 particles, where the propagation energy of the cracks is consumed and the spreading of the cracks is inhibited. This leads to the improvement of the oxidation resistance of the SiBCN ceramics. Fig. S2(d e f) shows the surface morphology of the HfO2-coated SiBCN/HfC ceramic composites after oxidation at 1500 ºC for 3h. The formation of HfSiO4 originated from the reaction between HfO2 and the silica that filled the pores in the HfO2 films, then gradually spread and covered the surface of the SiBCN/HfC ceramic composites. The dense HfSiO4 film prevents the diffusion of oxygen into the ceramic matrix. Combined with the morphology shown in Fig. 5(a)(c), the dispersion of HfO2 and HfSiO4 in silica helps maintain the integrity of the protective layer. To some extent, the oxidation resistance is enhanced by the HfO2 resulting from the oxidation of the HfC content.





Fig. S3 XRD patterns of the HfO2-coated SiBCN and SiBCN/HfC ceramic composites after oxidation at 1500 ºC for 3h. The main phase of the HfO2-coated ceramics after oxidation is made of HfSiO4, β-SiC, α-SiC, and HfO2. Most HfO2 is converted to HfSiO4 via the reaction with SiO2.There are no significant cristobalite peaks in the pattern, indicating that HfO2 can effectively hinder the phase transformation from amorphous silica to cristobalite.


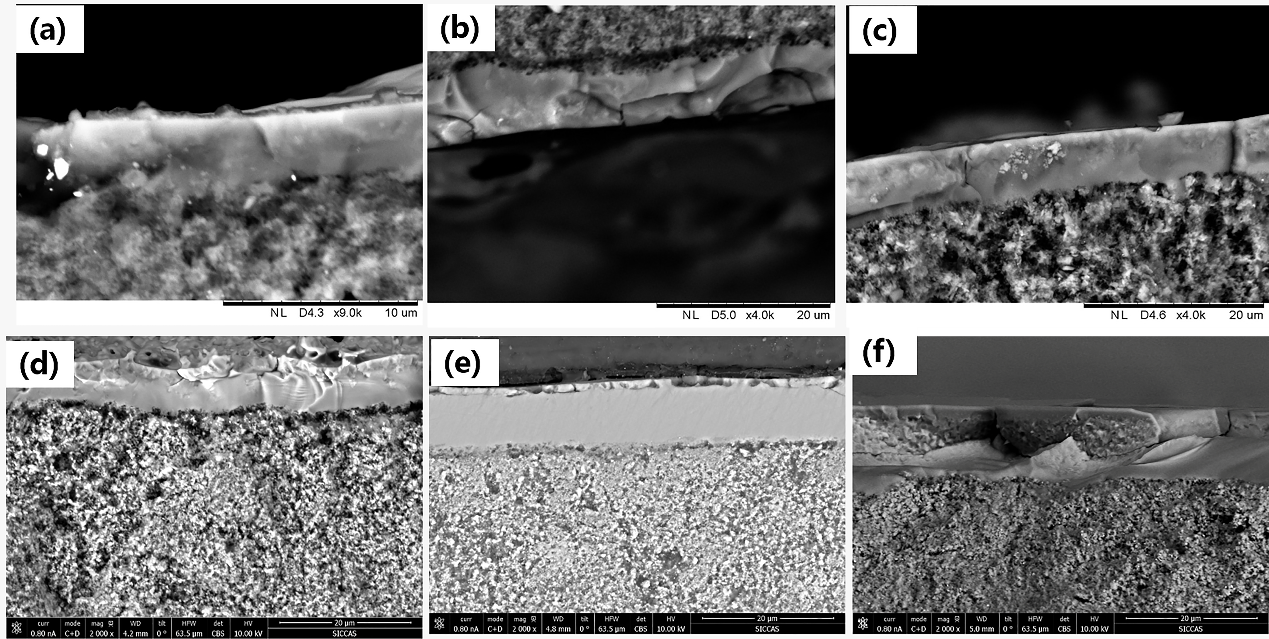
Fig. S4 Fracture morphology of the SiBCN ceramics after oxidation at 1500 ºC for different soaking times: (a) 1 h, (b) 3 h, (c) 5 h, (d) 10 h, (e) 15 h, and (f) 20 h. The thickness of the oxide scales was measured from the fracture morphology.


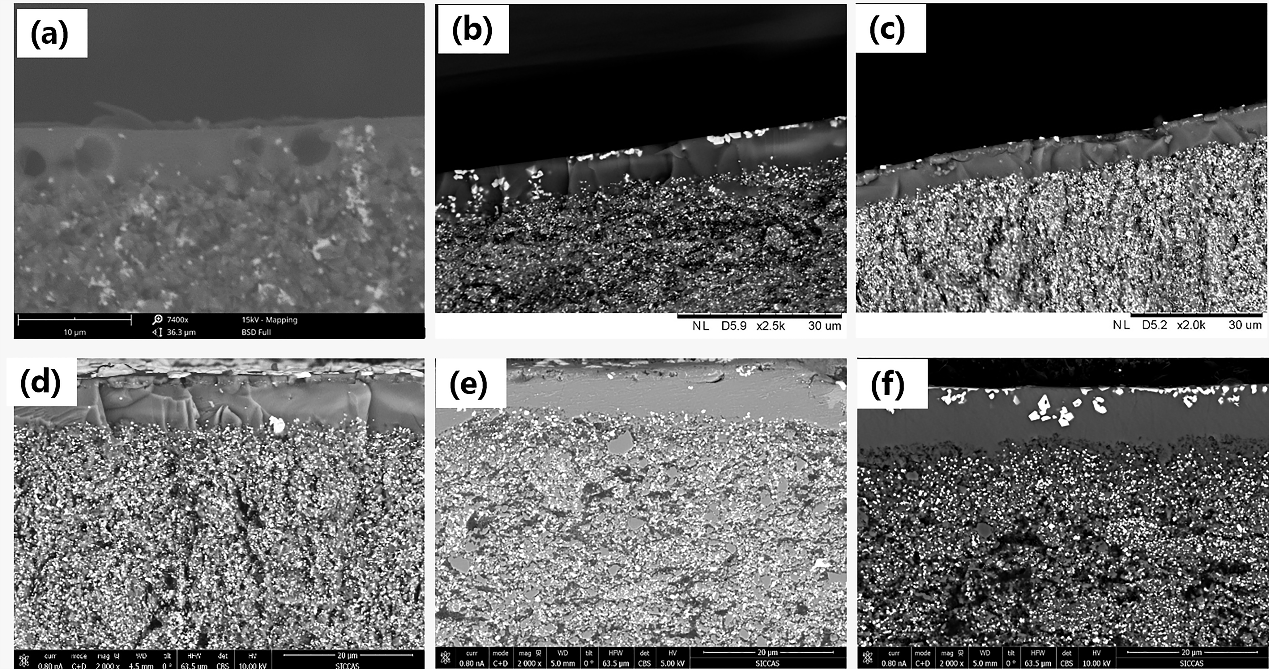


Fig. S5 Fracture morphology of the SiBCN/HfC ceramic composites after oxidation at 1500 ºC for different soaking times: (a) 1 h, (b) 3 h, (c) 5 h, (d) 10 h, (e) 15 h, and (f) 20 h. The thickness of the oxide scales was measured from the fracture morphology.

Table 1. Fit equation of y2=kt+c and Pearson coefficient r.

| Label | Fitting equation | Pearson coefficient r |
| --- | --- | --- |
| SiBCN:1~5h | =10.8t+1.6 | 1 |
| SiBCN/HfC:1~5h | =8.1t+8.1 | 0.998 |
| SiBCN:5~20h | =5.4t+17.0 | 0.945 |
| SiBCN/HfC:5~20h | =1.1t+44 | 0.988 |


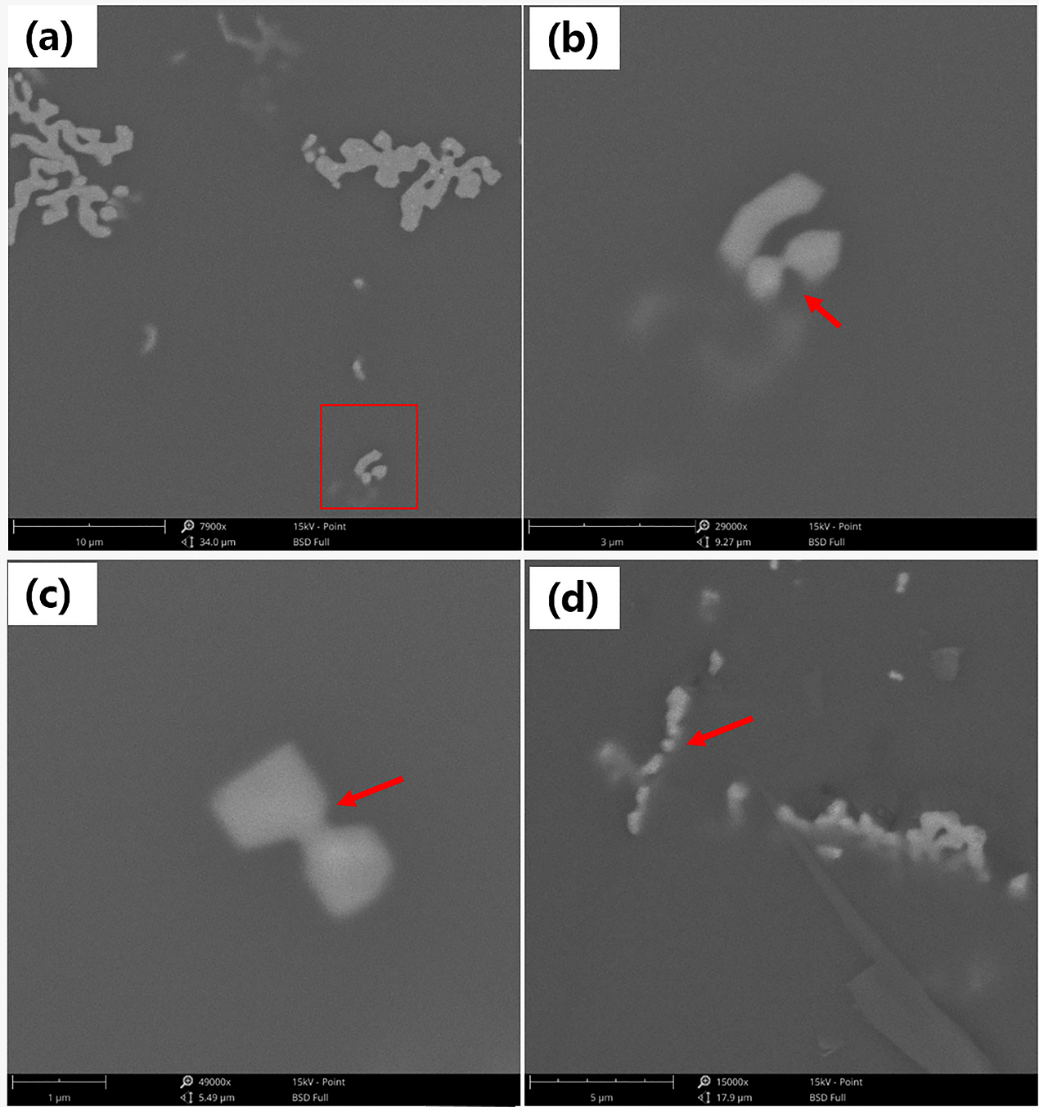


Fig. S6 Surface morphology of the SiBCN/HfC ceramic composites after oxidation at 1750 ºC for 2h. (a)(c)(d). (b) Enlarged view of the area marked by the red square in (a).

Fig. S6 presents the HfSiO4/HfO2 grain growth on the surface of the silica layer, including the neck contact (Fig. S6(b)) between two particles and neck growth (Fig. S6(c)).


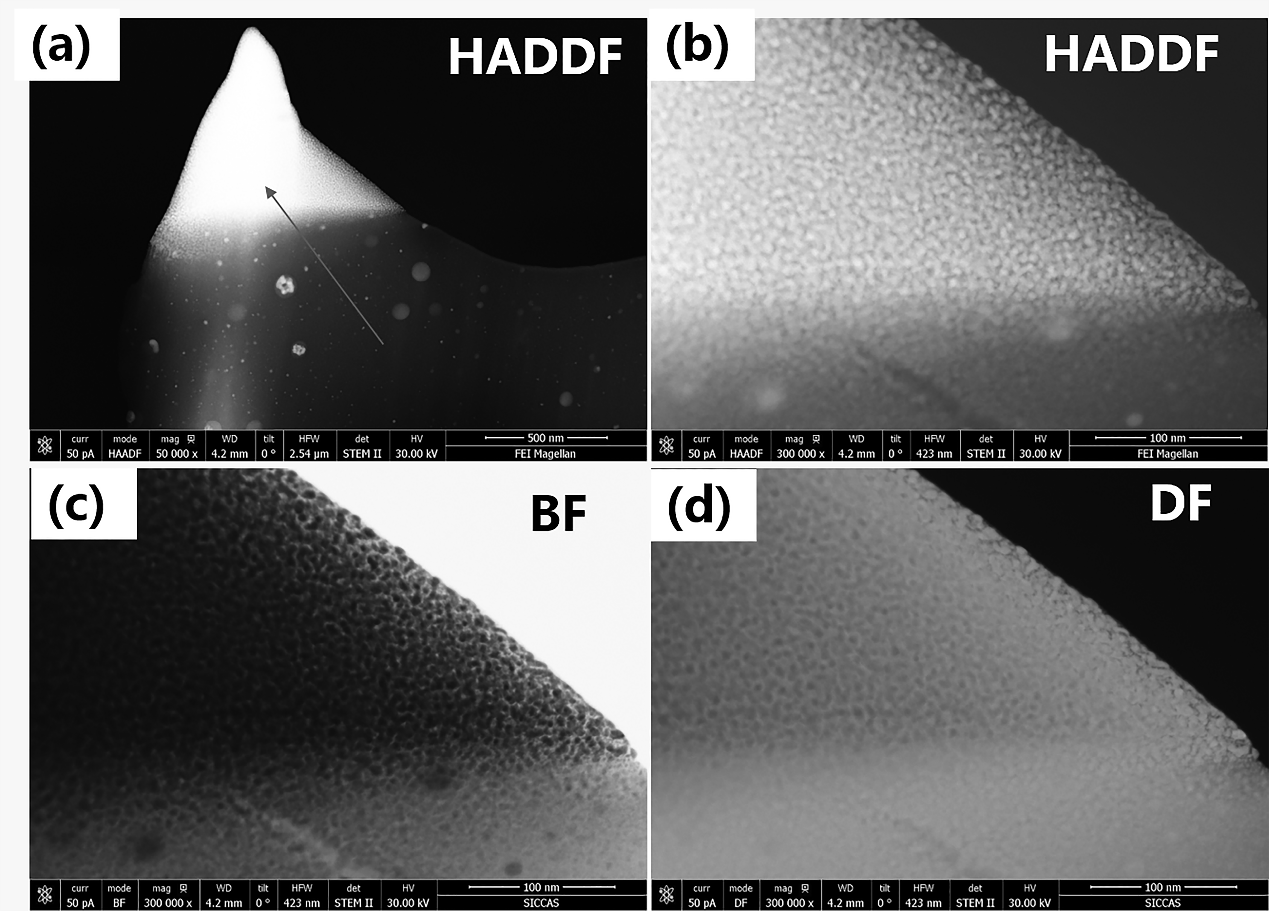


Fig. S7 SEM images of the particles dispersed on the surface of the silica. (a) HAADF image; (b) Enlarged HAADF image of (a); (c) Bright field image; (d) Dark field image

The difference in contrast in the HADDF image represents the difference in the composition. For a pure HfSiO4 phase, the contrast should be uniform. However, Fig. S7 shows that it consists of nanoparticles with two different contrasts .Therefore, we assumed that the surface HfSiO4 underwent a phase transition at the decomposition temperature of 1750 °C.


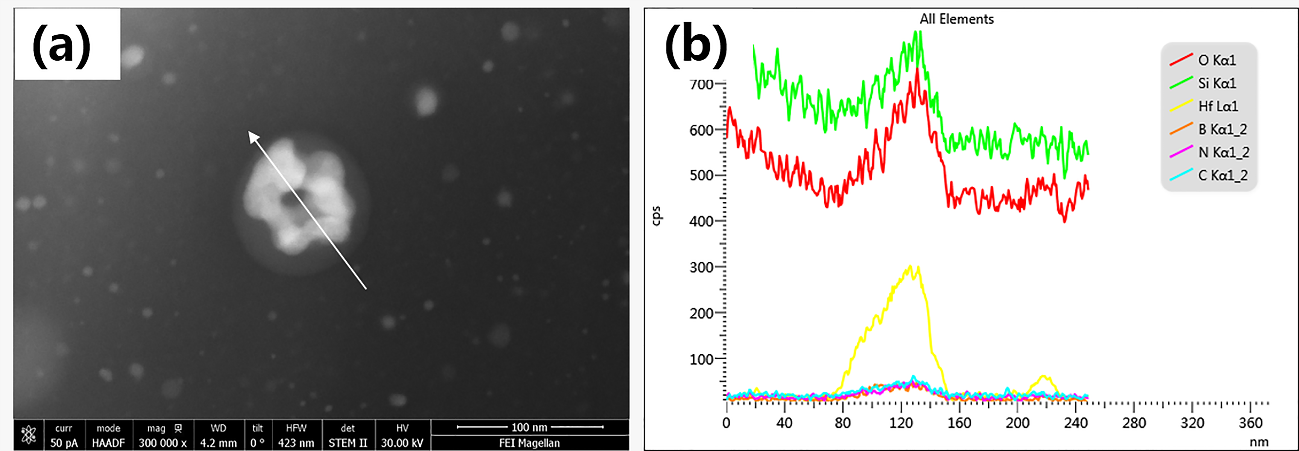
Fig. S8 HADDF-SEM images (a) of the nanoparticles dispersed in the silica and corresponding EDS line analysis (b).

The description of the core-shell structure of SiC and BN(C) was changed to a “capsule-like” structure. There are no significant pores in Fig. 8. The typical core-shell structure was present in Fig. S8 and the EDS line analysis indicated an HfSiO4 core and a BN(C) shell.


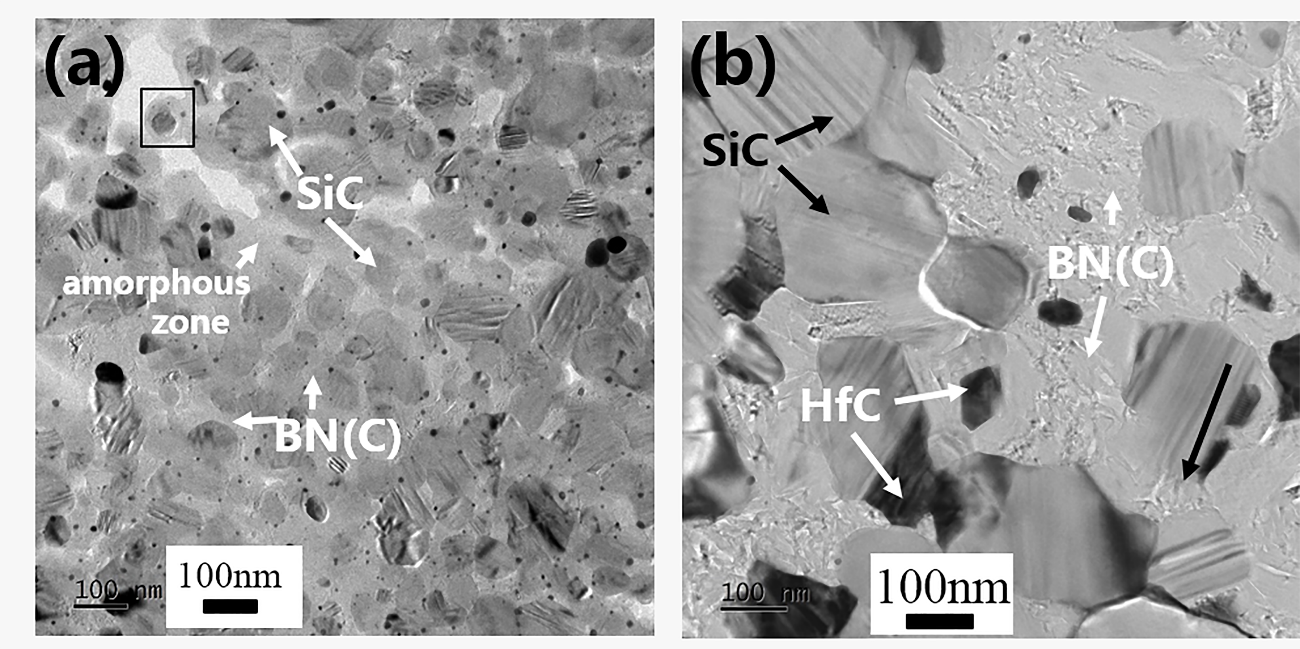


Fig. S9 TEM morphology of ceramics: (a) SiBCN and (b) SiBCN/HfC.

Fig. S9 shows that the grain diameter of the SiBCN ceramics was around 100 nm, but the grain diameter of the SiBCN/HfC ceramic composites ranged from 100 to 500 nm. This was attributed to HfC promoting grain growth of in the matrix.
